# Supplementary material for: Advanced Glycation End Products Impair Cardiac Atrial Appendage Stem Cells Properties
Source: MDPI journal article supplement (doi:10.3390/jcm10132964), 2021-07-01
Supplement: s1 [file s1]

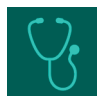

## Supplementary material

# Advanced glycation end products impair cardiac atrial appendage stem cells properties

Lize Evens<sup>1</sup>, Ellen Heeren<sup>1</sup>, Jean-Luc Rummens<sup>1,2</sup>, Annelies Bronckaers<sup>1</sup>, Marc Hendrikx<sup>1</sup>, Dorien Deluyker<sup>1,†</sup>, Virginie Bito<sup>1,\*,†</sup>

### 1. Supplementary figures

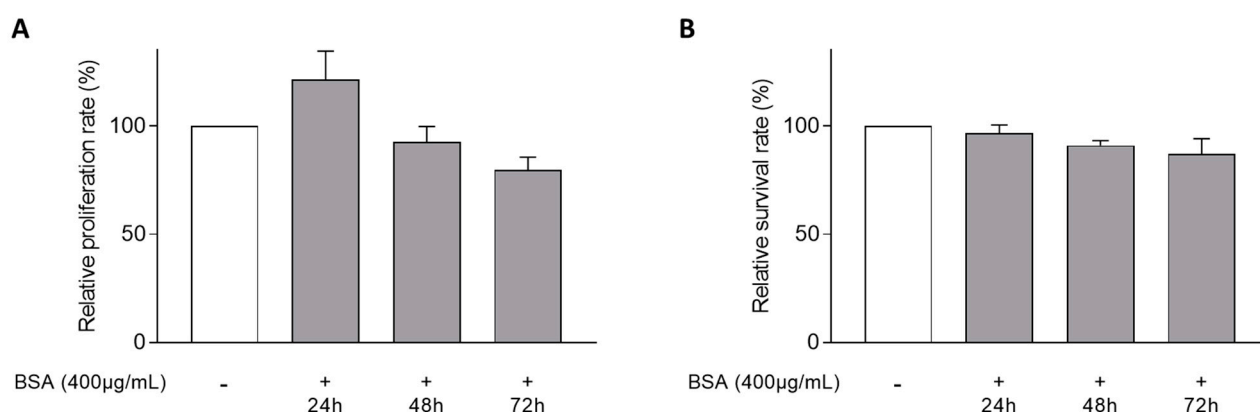

**Figure S1. Effect of BSA over time on CASCs proliferation and survival.** CASCs were exposed to 400 µg/mL BSA for 24, 48, or 72 hours and proliferation (A, n=6) or survival (B, n=7) were evaluated. Data are normalized to the control (media with 2% FCS for proliferation and 0% FCS for survival, both without BSA) and are represented as mean ± SEM.

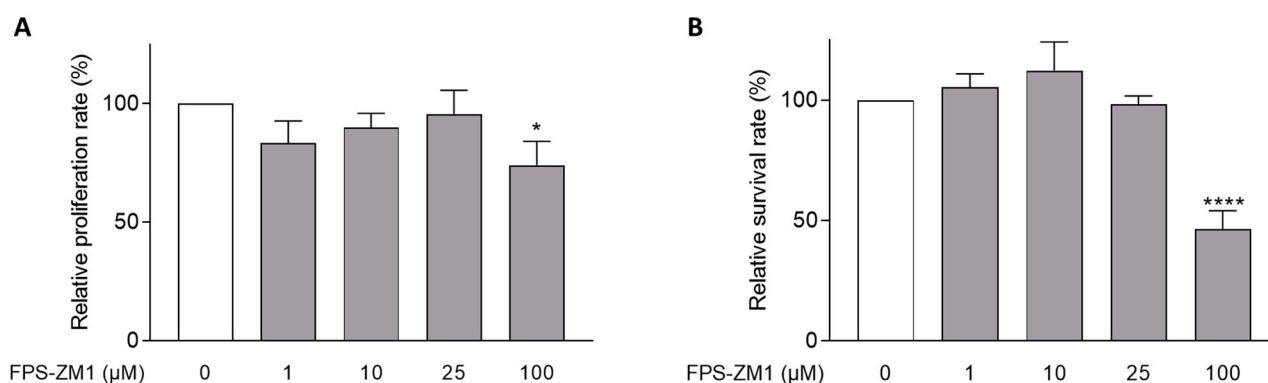

**Figure S2. Effect of ranging concentrations of the RAGE inhibitor (FPS-ZM1) on CASCs proliferation and survival.** CASCs were exposed to ranging concentrations (0, 1, 10, 25, and 100 µM) of FPS-ZM1 for 72 hours in a proliferation (A, n=6) and survival (B, n=5) assay. Data are normalized to the 0 µM concentration and are represented as mean ± SEM. \*denotes  $p < 0.05$ , and \*\*\*\*denotes  $p < 0.0001$  vs. 0 µM FPS-ZM1.
